# Supplementary material
Source: MDPI journal article supplement (https://www.mdpi.com/2073-4395/13/12/3079)
Supplement: s1 [file s1]

Table S1 Correlation analysis between rivers and N and P discharge amounts in the region.

| City   | River            | Correlation coefficient | P value |
|--------|------------------|-------------------------|---------|
| Feixi  | Pai river        | 0.764                   | < 0.05  |
| Chaohu | Shuangqiao river | 0.726                   | < 0.05  |
| Jinan  | Fengle river     | 0.696                   | < 0.05  |
